# Supplementary material for: Paternal phthalate exposure-elicited offspring metabolic disorders are associated with altered sperm small RNAs in mice
Source: PubMed Central journal article supplement (PMC10194346; doi:10.1016/j.envint.2023.107769), 2023-01-23

Supplementary Material for

**Paternal phthalate exposure-elicited offspring metabolic disorders are associated with altered sperm small RNAs in mice**

Jingwei Liu,<sup>1</sup> Junchao Shi,<sup>1</sup> Rebecca Hernandez,<sup>1</sup> Xiuchun Li,<sup>1</sup> Pranav Konchadi,<sup>1</sup> Yuma Miyake,<sup>1</sup> Qi Chen,<sup>1</sup> Tong Zhou,<sup>2</sup> and Changcheng Zhou<sup>1,\*</sup>

<sup>1</sup>Division of Biomedical Sciences, School of Medicine, University of California, Riverside, CA 92521

<sup>2</sup>Department of Physiology and Cell Biology, University of Nevada, Reno School of Medicine, NV 89557

**This PDF file includes:**

**Supplemental Table 1-3**

**Supplemental Figure 1. Uncropped Western blot images.**

## Supplemental Tale 1. Primer sequences for QPCR

| Genes   | Forward Primer sequences (5'-3') | Reverse primer sequences(5'-3') |
|---------|----------------------------------|---------------------------------|
| glut2   | GGCTAATTTTCAGGACTGGTT            | TTTCTTTGCCCTGACTTCCT            |
| glut4   | CAGAAGGTGATTGAACAGAG             | AATGATGCCAATGAGAAAGG            |
| glut9   | CCAATATGGGTACAACGTAGCTG          | GCGTCAAGGTGAAGGACTCAATA         |
| tlr8    | GAAAACATGCCCCCTCAGTCA            | CGTCACAAGGATAGCTTCTGGAA         |
| ccl6    | GCTGGCCTCATACAAGAAATGG           | GCTTAGGCACCTCTGAACTCTC          |
| ccr1    | CTCATGCAGCATAGGAGGCTT            | ACATGGCATCACCAAAAATCCA          |
| s100a8  | AAATCACCATGCCCTCTACAAG           | CCCACTTTTATCACCATCGCAA          |
| socs3   | ATGGTCACCCACAGCAAGTTT            | TCCAGTAGAATCCGCTCTCCT           |
| hpgd    | GTGAACGGCAAAGTGGCTCT             | TCCAATCCACCAATGCTACCT           |
| hsd17b6 | GGAGCGTGTGGAGACAGAG              | GAGGTTCACTTGAAAGATAGGCA         |
| ces1d   | AGAGCCCTGGAGCTTCGTG              | GAGCACATAGGCGGGTAGGAG           |
| cyp46a1 | AGCCGCTATGAGCACATCC              | CCATACTTCTTAGCCCAATCCAG         |
| galnt2  | GAGGAGGCCCTTTTCATCGC             | ACCTTCAAAGCTCTCTGGTAAGA         |
| gapdh   | AACTTTGGCATTGTGGAAGG             | GGATGCAGGGATGATGTTCT            |

**Supplemental Table 2. Detailed RNA-seq data of hepatic DEGs  
induced by paternal DCHP exposure**

| Gene            | logFC  | PValue | FDR    | FC      | Gene                  | logFC  | PValue | FDR    | FC     |
|-----------------|--------|--------|--------|---------|-----------------------|--------|--------|--------|--------|
| <i>Gm21541</i>  | 6.1584 | 0.0025 | 0.0982 | 71.4248 | <i>Selenbp2</i>       | 2.4367 | 0.0000 | 0.0010 | 5.4141 |
| <i>Pla2g4b</i>  | 5.3363 | 0.0007 | 0.0488 | 40.4009 | <i>Srrm4</i>          | 2.3779 | 0.0001 | 0.0117 | 5.1980 |
| <i>Klk1</i>     | 4.9436 | 0.0000 | 0.0024 | 30.7727 | <i>Lcn2</i>           | 2.3586 | 0.0002 | 0.0266 | 5.1287 |
| <i>Ngp</i>      | 4.7673 | 0.0005 | 0.0406 | 27.2329 | <i>Gulp1</i>          | 2.2790 | 0.0018 | 0.0812 | 4.8533 |
| <i>Fam205a1</i> | 4.4598 | 0.0013 | 0.0673 | 22.0052 | <i>Ccr1</i>           | 2.2730 | 0.0003 | 0.0276 | 4.8333 |
| <i>Grip2</i>    | 4.2877 | 0.0003 | 0.0309 | 19.5306 | <i>Btg2</i>           | 2.2610 | 0.0000 | 0.0020 | 4.7933 |
| <i>Gm49369</i>  | 4.2749 | 0.0019 | 0.0848 | 19.3589 | <i>H2bc9</i>          | 2.1984 | 0.0009 | 0.0556 | 4.5896 |
| <i>Lrrc69</i>   | 4.2265 | 0.0008 | 0.0544 | 18.7203 | <i>Thsd7a</i>         | 2.1952 | 0.0001 | 0.0172 | 4.5795 |
| <i>Moxd1</i>    | 4.1776 | 0.0009 | 0.0552 | 18.0960 | <i>Mmp7</i>           | 2.1660 | 0.0001 | 0.0167 | 4.4879 |
| <i>Sh2d1b1</i>  | 4.1291 | 0.0018 | 0.0812 | 17.4980 | <i>Hcar2</i>          | 2.1628 | 0.0004 | 0.0332 | 4.4777 |
| <i>Shisal1</i>  | 4.1172 | 0.0006 | 0.0454 | 17.3539 | <i>Dhrs9</i>          | 2.1619 | 0.0001 | 0.0127 | 4.4750 |
| <i>Adra2a</i>   | 4.0640 | 0.0007 | 0.0488 | 16.7256 | <i>Prokr1</i>         | 2.1378 | 0.0017 | 0.0801 | 4.4010 |
| <i>Dmrt2</i>    | 4.0557 | 0.0007 | 0.0485 | 16.6295 | <i>Ly6d</i>           | 2.1182 | 0.0016 | 0.0755 | 4.3415 |
| <i>Actl9</i>    | 4.0478 | 0.0013 | 0.0682 | 16.5395 | <i>Dusp8</i>          | 2.0451 | 0.0000 | 0.0027 | 4.1270 |
| <i>Gipc2</i>    | 3.9476 | 0.0001 | 0.0162 | 15.4297 | <i>Chrm3</i>          | 2.0060 | 0.0000 | 0.0000 | 4.0167 |
| <i>Capn9</i>    | 3.5745 | 0.0018 | 0.0812 | 11.9130 | <i>Serpina5</i>       | 1.9527 | 0.0000 | 0.0102 | 3.8710 |
| <i>Myom3</i>    | 3.4259 | 0.0001 | 0.0123 | 10.7476 | <i>Atf3</i>           | 1.9384 | 0.0000 | 0.0052 | 3.8329 |
| <i>Egr2</i>     | 3.4209 | 0.0016 | 0.0783 | 10.7100 | <i>Mcf2l</i>          | 1.9204 | 0.0023 | 0.0956 | 3.7852 |
| <i>Cd247</i>    | 3.3421 | 0.0002 | 0.0248 | 10.1407 | <i>Tmem156</i>        | 1.8908 | 0.0001 | 0.0126 | 3.7085 |
| <i>Mmp8</i>     | 3.2537 | 0.0010 | 0.0613 | 9.5378  | <i>Serpina1e</i>      | 1.8735 | 0.0001 | 0.0160 | 3.6643 |
| <i>Sult1e1</i>  | 3.2363 | 0.0014 | 0.0692 | 9.4239  | <i>Fam222a</i>        | 1.8664 | 0.0000 | 0.0070 | 3.6463 |
| <i>Saa2</i>     | 3.2276 | 0.0003 | 0.0309 | 9.3670  | <i>S100a9</i>         | 1.8654 | 0.0003 | 0.0306 | 3.6437 |
| <i>Fos</i>      | 3.2078 | 0.0002 | 0.0260 | 9.2393  | <i>Scn3a</i>          | 1.8256 | 0.0004 | 0.0353 | 3.5446 |
| <i>Gm20422</i>  | 3.1865 | 0.0002 | 0.0235 | 9.1041  | <i>Syn1</i>           | 1.7870 | 0.0004 | 0.0362 | 3.4510 |
| <i>Egr1</i>     | 3.1185 | 0.0001 | 0.0160 | 8.6846  | <i>Mup8</i>           | 1.7404 | 0.0005 | 0.0383 | 3.3414 |
| <i>Cxcl1</i>    | 3.0568 | 0.0000 | 0.0064 | 8.3210  | <i>Prkcb</i>          | 1.7199 | 0.0009 | 0.0566 | 3.2942 |
| <i>Tchh</i>     | 3.0085 | 0.0000 | 0.0005 | 8.0472  | <i>Nr4a3</i>          | 1.6975 | 0.0025 | 0.0987 | 3.2435 |
| <i>S100a8</i>   | 2.9737 | 0.0000 | 0.0052 | 7.8556  | <i>Slc37a1</i>        | 1.6974 | 0.0000 | 0.0030 | 3.2431 |
| <i>Saa1</i>     | 2.9241 | 0.0002 | 0.0197 | 7.5897  | <i>9930111J21Rik1</i> | 1.6970 | 0.0022 | 0.0934 | 3.2422 |
| <i>Ckap2</i>    | 2.8844 | 0.0001 | 0.0184 | 7.3838  | <i>E030018B13Rik</i>  | 1.6444 | 0.0003 | 0.0296 | 3.1261 |
| <i>Tff3</i>     | 2.8463 | 0.0003 | 0.0296 | 7.1915  | <i>Tlr8</i>           | 1.6286 | 0.0001 | 0.0190 | 3.0922 |
| <i>Ugt2b37</i>  | 2.7411 | 0.0000 | 0.0025 | 6.6857  | <i>1700017B05Rik</i>  | 1.6186 | 0.0000 | 0.0009 | 3.0708 |
| <i>Btd19</i>    | 2.6922 | 0.0004 | 0.0345 | 6.4628  | <i>Mt2</i>            | 1.6173 | 0.0000 | 0.0073 | 3.0680 |
| <i>44807</i>    | 2.6846 | 0.0025 | 0.0979 | 6.4288  | <i>Abcb1b</i>         | 1.6159 | 0.0000 | 0.0002 | 3.0651 |
| <i>Epb41l3</i>  | 2.6716 | 0.0001 | 0.0120 | 6.3713  | <i>Fmn2</i>           | 1.5882 | 0.0000 | 0.0102 | 3.0067 |
| <i>Scara5</i>   | 2.5991 | 0.0000 | 0.0000 | 6.0591  | <i>Ccdc120</i>        | 1.5620 | 0.0010 | 0.0589 | 2.9527 |
| <i>Adcy1</i>    | 2.5949 | 0.0000 | 0.0086 | 6.0415  | <i>Vmn2r124</i>       | 1.5559 | 0.0020 | 0.0884 | 2.9402 |
| <i>Fosb</i>     | 2.5905 | 0.0004 | 0.0345 | 6.0229  | <i>Bdkrb2</i>         | 1.5541 | 0.0014 | 0.0702 | 2.9365 |
| <i>F13a1</i>    | 2.5133 | 0.0019 | 0.0848 | 5.7092  | <i>Socs3</i>          | 1.5425 | 0.0001 | 0.0136 | 2.9129 |
| <i>Myc</i>      | 2.4852 | 0.0009 | 0.0555 | 5.5992  | <i>Fst</i>            | 1.5335 | 0.0020 | 0.0871 | 2.8949 |

| Gene           | logFC  | PValue | FDR    | FC     | Gene             | logFC  | PValue | FDR    | FC     |
|----------------|--------|--------|--------|--------|------------------|--------|--------|--------|--------|
| <i>Igfbp1</i>  | 1.5218 | 0.0013 | 0.0675 | 2.8716 | <i>Fgl1</i>      | 1.0213 | 0.0000 | 0.0069 | 2.0297 |
| <i>Steap4</i>  | 1.5050 | 0.0000 | 0.0096 | 2.8382 | <i>Atp11a</i>    | 1.0016 | 0.0019 | 0.0833 | 2.0022 |
| <i>Aspm</i>    | 1.5002 | 0.0000 | 0.0044 | 2.8289 | <i>Serpina3n</i> | 0.9912 | 0.0003 | 0.0309 | 1.9879 |
| <i>Pkib</i>    | 1.4820 | 0.0002 | 0.0242 | 2.7934 | <i>Rasgef1b</i>  | 0.9841 | 0.0001 | 0.0177 | 1.9780 |
| <i>Cd14</i>    | 1.4766 | 0.0000 | 0.0006 | 2.7828 | <i>Slc8a1</i>    | 0.9681 | 0.0008 | 0.0539 | 1.9562 |
| <i>Galnt3</i>  | 1.4385 | 0.0020 | 0.0872 | 2.7104 | <i>Acmsd</i>     | 0.9638 | 0.0017 | 0.0804 | 1.9504 |
| <i>Bmper</i>   | 1.4061 | 0.0017 | 0.0788 | 2.6502 | <i>Cyp26b1</i>   | 0.9626 | 0.0006 | 0.0424 | 1.9488 |
| <i>E2f8</i>    | 1.3474 | 0.0000 | 0.0024 | 2.5446 | <i>Rsad2</i>     | 0.9227 | 0.0002 | 0.0242 | 1.8957 |
| <i>Thbs1</i>   | 1.3466 | 0.0008 | 0.0518 | 2.5431 | <i>Fgfr1</i>     | 0.9131 | 0.0004 | 0.0347 | 1.8831 |
| <i>Tnfaip3</i> | 1.3187 | 0.0003 | 0.0309 | 2.4945 | <i>C9orf72</i>   | 0.9064 | 0.0003 | 0.0292 | 1.8744 |
| <i>Junb</i>    | 1.3184 | 0.0013 | 0.0675 | 2.4939 | <i>Cnbd2</i>     | 0.8981 | 0.0016 | 0.0755 | 1.8637 |
| <i>Cytip</i>   | 1.2802 | 0.0003 | 0.0274 | 2.4288 | <i>Btg3</i>      | 0.8914 | 0.0013 | 0.0687 | 1.8549 |
| <i>Pdk4</i>    | 1.2680 | 0.0014 | 0.0697 | 2.4083 | <i>Col4a1</i>    | 0.8877 | 0.0000 | 0.0000 | 1.8502 |
| <i>Agap2</i>   | 1.2558 | 0.0000 | 0.0004 | 2.3880 | <i>Cyb561</i>    | 0.8859 | 0.0001 | 0.0160 | 1.8480 |
| <i>Itgam</i>   | 1.2532 | 0.0022 | 0.0921 | 2.3837 | <i>Cd300a</i>    | 0.8819 | 0.0004 | 0.0362 | 1.8428 |
| <i>Plk3</i>    | 1.2492 | 0.0022 | 0.0914 | 2.3771 | <i>Cep290</i>    | 0.8794 | 0.0009 | 0.0549 | 1.8396 |
| <i>Mt1</i>     | 1.2491 | 0.0010 | 0.0613 | 2.3770 | <i>C6</i>        | 0.8768 | 0.0000 | 0.0017 | 1.8363 |
| <i>Arid5a</i>  | 1.2415 | 0.0008 | 0.0526 | 2.3644 | <i>Slc6a8</i>    | 0.8705 | 0.0001 | 0.0120 | 1.8282 |
| <i>Ccna2</i>   | 1.2153 | 0.0008 | 0.0541 | 2.3218 | <i>Kctd17</i>    | 0.8646 | 0.0000 | 0.0069 | 1.8209 |
| <i>Nnumt</i>   | 1.1767 | 0.0003 | 0.0276 | 2.2606 | <i>Retreg1</i>   | 0.8595 | 0.0000 | 0.0052 | 1.8145 |
| <i>Ercc6l2</i> | 1.1738 | 0.0001 | 0.0169 | 2.2560 | <i>Egfr</i>      | 0.8583 | 0.0015 | 0.0755 | 1.8129 |
| <i>Tlr13</i>   | 1.1692 | 0.0001 | 0.0194 | 2.2488 | <i>Cntnap1</i>   | 0.8474 | 0.0008 | 0.0536 | 1.7993 |
| <i>Slc3a1</i>  | 1.1687 | 0.0014 | 0.0700 | 2.2481 | <i>Smpd3</i>     | 0.8388 | 0.0018 | 0.0812 | 1.7885 |
| <i>Cd163</i>   | 1.1658 | 0.0007 | 0.0511 | 2.2436 | <i>Mpzl1</i>     | 0.8324 | 0.0009 | 0.0552 | 1.7807 |
| <i>Ccl6</i>    | 1.1555 | 0.0000 | 0.0010 | 2.2276 | <i>Stat3</i>     | 0.8315 | 0.0000 | 0.0015 | 1.7796 |
| <i>Ikzf4</i>   | 1.1553 | 0.0008 | 0.0518 | 2.2274 | <i>Arl13b</i>    | 0.8045 | 0.0000 | 0.0061 | 1.7465 |
| <i>Slc41a2</i> | 1.1536 | 0.0006 | 0.0425 | 2.2247 | <i>Zbtb21</i>    | 0.8032 | 0.0000 | 0.0082 | 1.7450 |
| <i>Cldn14</i>  | 1.1474 | 0.0007 | 0.0481 | 2.2151 | <i>Sla</i>       | 0.7981 | 0.0025 | 0.0984 | 1.7388 |
| <i>Dock11</i>  | 1.1307 | 0.0011 | 0.0616 | 2.1897 | <i>Serpina3c</i> | 0.7889 | 0.0002 | 0.0242 | 1.7278 |
| <i>Kif24</i>   | 1.0983 | 0.0022 | 0.0914 | 2.1410 | <i>Nin</i>       | 0.7886 | 0.0006 | 0.0427 | 1.7274 |
| <i>Map3k6</i>  | 1.0977 | 0.0011 | 0.0638 | 2.1401 | <i>Zfp281</i>    | 0.7871 | 0.0000 | 0.0084 | 1.7257 |
| <i>P2ry13</i>  | 1.0920 | 0.0018 | 0.0812 | 2.1316 | <i>Fbn1</i>      | 0.7854 | 0.0005 | 0.0405 | 1.7235 |
| <i>Fndc3b</i>  | 1.0910 | 0.0000 | 0.0000 | 2.1303 | <i>Golm1</i>     | 0.7811 | 0.0022 | 0.0914 | 1.7184 |
| <i>Grem2</i>   | 1.0706 | 0.0003 | 0.0274 | 2.1003 | <i>Tubb2a</i>    | 0.7801 | 0.0001 | 0.0177 | 1.7173 |
| <i>Emilin2</i> | 1.0573 | 0.0010 | 0.0612 | 2.0810 | <i>Nlrp12</i>    | 0.7779 | 0.0003 | 0.0292 | 1.7146 |
| <i>Fosl2</i>   | 1.0512 | 0.0000 | 0.0104 | 2.0723 | <i>Atg16l2</i>   | 0.7736 | 0.0000 | 0.0104 | 1.7096 |
| <i>Cd207</i>   | 1.0455 | 0.0017 | 0.0788 | 2.0641 | <i>Tanc2</i>     | 0.7733 | 0.0002 | 0.0266 | 1.7092 |
| <i>Csf2rb2</i> | 1.0417 | 0.0013 | 0.0673 | 2.0587 | <i>Lrfn3</i>     | 0.7710 | 0.0003 | 0.0297 | 1.7065 |
| <i>Klf6</i>    | 1.0321 | 0.0000 | 0.0009 | 2.0450 | <i>Fbfl</i>      | 0.7709 | 0.0011 | 0.0629 | 1.7064 |
| <i>Grhl1</i>   | 1.0308 | 0.0015 | 0.0744 | 2.0431 | <i>Ccnl1</i>     | 0.7672 | 0.0007 | 0.0488 | 1.7020 |
| <i>Slc41a3</i> | 1.0284 | 0.0000 | 0.0084 | 2.0397 | <i>Entpd1</i>    | 0.7659 | 0.0005 | 0.0376 | 1.7004 |

| Gene            | logFC  | PValue | FDR    | FC     | Gene             | logFC  | PValue | FDR    | FC     |
|-----------------|--------|--------|--------|--------|------------------|--------|--------|--------|--------|
| <i>Nedd9</i>    | 0.7576 | 0.0000 | 0.0063 | 1.6907 | <i>Olfir1033</i> | 0.6555 | 0.0000 | 0.0052 | 1.5751 |
| <i>Lrg1</i>     | 0.7554 | 0.0026 | 0.0995 | 1.6880 | <i>Fam124a</i>   | 0.6512 | 0.0004 | 0.0345 | 1.5704 |
| <i>Gjc3</i>     | 0.7536 | 0.0025 | 0.0989 | 1.6860 | <i>Gfra1</i>     | 0.6490 | 0.0001 | 0.0144 | 1.5681 |
| <i>Rab30</i>    | 0.7530 | 0.0000 | 0.0017 | 1.6853 | <i>Ahcyl2</i>    | 0.6475 | 0.0000 | 0.0052 | 1.5664 |
| <i>Pla2g7</i>   | 0.7514 | 0.0014 | 0.0711 | 1.6834 | <i>Acsl4</i>     | 0.6449 | 0.0000 | 0.0073 | 1.5636 |
| <i>Cd93</i>     | 0.7480 | 0.0007 | 0.0497 | 1.6794 | <i>Garem1</i>    | 0.6371 | 0.0000 | 0.0002 | 1.5552 |
| <i>Slc16a6</i>  | 0.7475 | 0.0000 | 0.0075 | 1.6788 | <i>Elk4</i>      | 0.6357 | 0.0000 | 0.0007 | 1.5537 |
| <i>Rel</i>      | 0.7463 | 0.0000 | 0.0070 | 1.6775 | <i>Hspb8</i>     | 0.6295 | 0.0003 | 0.0309 | 1.5470 |
| <i>Tsc22d2</i>  | 0.7445 | 0.0006 | 0.0469 | 1.6754 | <i>Synpo</i>     | 0.6287 | 0.0018 | 0.0812 | 1.5461 |
| <i>C8b</i>      | 0.7404 | 0.0026 | 0.0996 | 1.6707 | <i>Desi2</i>     | 0.6281 | 0.0000 | 0.0061 | 1.5455 |
| <i>Anxa1</i>    | 0.7375 | 0.0019 | 0.0833 | 1.6673 | <i>Snx10</i>     | 0.6275 | 0.0004 | 0.0332 | 1.5449 |
| <i>B4galt6</i>  | 0.7314 | 0.0006 | 0.0424 | 1.6603 | <i>Dst</i>       | 0.6269 | 0.0000 | 0.0061 | 1.5442 |
| <i>B4galt4</i>  | 0.7298 | 0.0024 | 0.0976 | 1.6584 | <i>Ano6</i>      | 0.6224 | 0.0016 | 0.0779 | 1.5394 |
| <i>Mbnl2</i>    | 0.7262 | 0.0001 | 0.0165 | 1.6542 | <i>Ttpal</i>     | 0.6167 | 0.0003 | 0.0296 | 1.5334 |
| <i>Olfir344</i> | 0.7196 | 0.0003 | 0.0296 | 1.6467 | <i>Mlxip</i>     | 0.6157 | 0.0010 | 0.0613 | 1.5323 |
| <i>Rell1</i>    | 0.7135 | 0.0023 | 0.0950 | 1.6398 | <i>Apobec1</i>   | 0.6135 | 0.0001 | 0.0136 | 1.5299 |
| <i>Lad1</i>     | 0.7107 | 0.0006 | 0.0424 | 1.6365 | <i>Mical2</i>    | 0.6123 | 0.0000 | 0.0010 | 1.5287 |
| <i>Bcl3</i>     | 0.7060 | 0.0012 | 0.0646 | 1.6313 | <i>Flna</i>      | 0.6119 | 0.0024 | 0.0960 | 1.5283 |
| <i>Skil</i>     | 0.7008 | 0.0000 | 0.0022 | 1.6254 | <i>Col4a2</i>    | 0.6104 | 0.0000 | 0.0000 | 1.5267 |
| <i>Rgs2</i>     | 0.6980 | 0.0010 | 0.0595 | 1.6223 | <i>Onecut2</i>   | 0.6089 | 0.0000 | 0.0015 | 1.5251 |
| <i>Slc25a22</i> | 0.6870 | 0.0004 | 0.0351 | 1.6100 | <i>Stk17b</i>    | 0.6059 | 0.0027 | 0.0998 | 1.5219 |
| <i>Apcs</i>     | 0.6857 | 0.0002 | 0.0204 | 1.6085 | <i>Gldc</i>      | 0.6057 | 0.0000 | 0.0009 | 1.5217 |
| <i>Neu3</i>     | 0.6852 | 0.0013 | 0.0673 | 1.6080 | <i>Fabp5</i>     | 0.6053 | 0.0018 | 0.0812 | 1.5213 |
| <i>Slc41a1</i>  | 0.6771 | 0.0023 | 0.0950 | 1.5990 | <i>Nedd4l</i>    | 0.6049 | 0.0005 | 0.0373 | 1.5208 |
| <i>Myh10</i>    | 0.6760 | 0.0000 | 0.0017 | 1.5977 | <i>Cyp4a12b</i>  | 0.6000 | 0.0001 | 0.0119 | 1.5157 |
| <i>Insig2</i>   | 0.6698 | 0.0000 | 0.0052 | 1.5909 | <i>Ptp4a1</i>    | 0.5998 | 0.0009 | 0.0552 | 1.5155 |
| <i>Dgkh</i>     | 0.6682 | 0.0000 | 0.0052 | 1.5891 | <i>Sh3pxd2a</i>  | 0.5915 | 0.0012 | 0.0646 | 1.5068 |
| <i>Col12a1</i>  | 0.6619 | 0.0023 | 0.0938 | 1.5822 | <i>Msr1</i>      | 0.5900 | 0.0017 | 0.0805 | 1.5053 |
| <i>Fam120c</i>  | 0.6609 | 0.0003 | 0.0316 | 1.5810 | <i>Clpx</i>      | 0.5881 | 0.0015 | 0.0726 | 1.5032 |
| <i>Setd7</i>    | 0.6597 | 0.0001 | 0.0127 | 1.5797 | <i>Tanc1</i>     | 0.5866 | 0.0002 | 0.0197 | 1.5017 |
| <i>Eppk1</i>    | 0.6592 | 0.0000 | 0.0039 | 1.5792 | <i>Wnk1</i>      | 0.5864 | 0.0004 | 0.0365 | 1.5015 |
| <i>Fyb2</i>     | 0.6590 | 0.0012 | 0.0667 | 1.5789 |                  |        |        |        |        |
| <i>Tor3a</i>    | 0.6560 | 0.0022 | 0.0921 | 1.5757 |                  |        |        |        |        |
| <i>Cntrl</i>    | 0.6555 | 0.0000 | 0.0005 | 1.5752 |                  |        |        |        |        |

| Gene                 | logFC   | PValue | FDR    | FC     | Gene                 | logFC   | PValue | FDR    | FC     |
|----------------------|---------|--------|--------|--------|----------------------|---------|--------|--------|--------|
| <i>Gm20388</i>       | -9.4576 | 0.0001 | 0.0193 | 0.0014 | <i>D130043K22Rik</i> | -0.8995 | 0.0012 | 0.0646 | 0.5361 |
| <i>Olfir1565</i>     | -6.8619 | 0.0000 | 0.0024 | 0.0086 | <i>Purg</i>          | -0.8973 | 0.0016 | 0.0777 | 0.5369 |
| <i>Cphx3</i>         | -6.7902 | 0.0010 | 0.0613 | 0.0090 | <i>Izumo4</i>        | -0.8815 | 0.0007 | 0.0488 | 0.5428 |
| <i>BC035947</i>      | -6.5240 | 0.0002 | 0.0205 | 0.0109 | <i>Mid1ip1</i>       | -0.8733 | 0.0025 | 0.0983 | 0.5459 |
| <i>Vmn1r53</i>       | -4.4005 | 0.0004 | 0.0345 | 0.0474 | <i>Dyrk3</i>         | -0.8726 | 0.0015 | 0.0720 | 0.5461 |
| <i>Noxa1</i>         | -3.9605 | 0.0009 | 0.0552 | 0.0642 | <i>Adamts7</i>       | -0.8606 | 0.0002 | 0.0203 | 0.5507 |
| <i>Lrrc71</i>        | -3.2579 | 0.0009 | 0.0570 | 0.1045 | <i>Sult1c2</i>       | -0.8566 | 0.0002 | 0.0242 | 0.5523 |
| <i>4930513O06Rik</i> | -2.5169 | 0.0001 | 0.0119 | 0.1747 | <i>Ces1d</i>         | -0.8507 | 0.0001 | 0.0120 | 0.5545 |
| <i>Hao2</i>          | -1.7975 | 0.0022 | 0.0914 | 0.2877 | <i>Lrit2</i>         | -0.8387 | 0.0000 | 0.0017 | 0.5591 |
| <i>Ms4a12</i>        | -1.7914 | 0.0014 | 0.0711 | 0.2889 | <i>Cyp26a1</i>       | -0.8008 | 0.0000 | 0.0020 | 0.5740 |
| <i>Cnmd</i>          | -1.6905 | 0.0000 | 0.0052 | 0.3098 | <i>Kcnk5</i>         | -0.7871 | 0.0018 | 0.0812 | 0.5795 |
| <i>Hamp2</i>         | -1.6859 | 0.0000 | 0.0002 | 0.3108 | <i>Impg2</i>         | -0.7713 | 0.0000 | 0.0102 | 0.5859 |
| <i>Dsg1c</i>         | -1.6295 | 0.0000 | 0.0000 | 0.3232 | <i>Gas1</i>          | -0.7483 | 0.0001 | 0.0109 | 0.5953 |
| <i>Myen</i>          | -1.5707 | 0.0006 | 0.0460 | 0.3366 | <i>Nr1i3</i>         | -0.7267 | 0.0000 | 0.0104 | 0.6043 |
| <i>Lrrc15</i>        | -1.5212 | 0.0000 | 0.0009 | 0.3484 | <i>Gstt2</i>         | -0.7180 | 0.0010 | 0.0610 | 0.6079 |
| <i>Acot3</i>         | -1.3758 | 0.0004 | 0.0367 | 0.3853 | <i>1810058I24Rik</i> | -0.7146 | 0.0001 | 0.0144 | 0.6094 |
| <i>Nat8f7</i>        | -1.3416 | 0.0002 | 0.0245 | 0.3946 | <i>Dbp</i>           | -0.6854 | 0.0005 | 0.0408 | 0.6218 |
| <i>Nr0b2</i>         | -1.1858 | 0.0015 | 0.0735 | 0.4396 | <i>Hpgd</i>          | -0.6723 | 0.0000 | 0.0015 | 0.6275 |
| <i>Slc6a16</i>       | -1.1068 | 0.0007 | 0.0474 | 0.4643 | <i>Akr1c19</i>       | -0.6702 | 0.0000 | 0.0001 | 0.6284 |
| <i>Serpina6</i>      | -1.0795 | 0.0000 | 0.0000 | 0.4732 | <i>4930579F01Rik</i> | -0.6599 | 0.0002 | 0.0250 | 0.6329 |
| <i>Inmt</i>          | -1.0789 | 0.0000 | 0.0003 | 0.4734 | <i>Syt3</i>          | -0.6535 | 0.0017 | 0.0800 | 0.6357 |
| <i>Serpinb1a</i>     | -1.0587 | 0.0013 | 0.0684 | 0.4800 | <i>Fdft1</i>         | -0.6498 | 0.0000 | 0.0061 | 0.6374 |
| <i>Tmem138</i>       | -1.0231 | 0.0022 | 0.0934 | 0.4920 | <i>Tk1</i>           | -0.6428 | 0.0001 | 0.0160 | 0.6404 |
| <i>Car1</i>          | -1.0204 | 0.0001 | 0.0136 | 0.4930 | <i>Aifm3</i>         | -0.6228 | 0.0005 | 0.0410 | 0.6494 |
| <i>Cyp46a1</i>       | -0.9969 | 0.0003 | 0.0292 | 0.5011 | <i>Pnpla1</i>        | -0.6181 | 0.0024 | 0.0968 | 0.6515 |
| <i>D930048N14Rik</i> | -0.9904 | 0.0008 | 0.0517 | 0.5033 | <i>Zfp606</i>        | -0.6044 | 0.0021 | 0.0896 | 0.6578 |
| <i>Delk3</i>         | -0.9711 | 0.0001 | 0.0166 | 0.5101 | <i>Ak2</i>           | -0.6023 | 0.0000 | 0.0016 | 0.6587 |
| <i>Cyp2a5</i>        | -0.9581 | 0.0000 | 0.0000 | 0.5147 | <i>Car3</i>          | -0.5993 | 0.0004 | 0.0365 | 0.6601 |
| <i>Slco1a4</i>       | -0.9333 | 0.0000 | 0.0015 | 0.5237 | <i>Zfp467</i>        | -0.5983 | 0.0005 | 0.0420 | 0.6605 |
| <i>Hsd17b6</i>       | -0.9171 | 0.0002 | 0.0197 | 0.5296 | <i>Slc2a5</i>        | -0.5953 | 0.0016 | 0.0783 | 0.6619 |
| <i>Map2k6</i>        | -0.9136 | 0.0006 | 0.0444 | 0.5308 | <i>Haus4</i>         | -0.5912 | 0.0000 | 0.0073 | 0.6638 |

FC: Fold Change; FDR: False Discovery rate

**Supplemental Table 3. PANDORA-seq detects significantly changed sperm rsRNAs and tsRNAs induced by DCHP exposure**

| Sequence                                       | Length | Annotation | fold_change | q_value (%) |
|------------------------------------------------|--------|------------|-------------|-------------|
| TTCGTACATCTAGGAGCTATAGAACTAGTACCGCAAGGGAAAG    | 43     | 16S-rRNA   | 2.5011      | 7.7906      |
| TTCTTAGTTGGTGGAG                               | 16     | 18S-rRNA   | 2.0982      | 0.0000      |
| TCTTAGTTGGTGGAG                                | 15     | 18S-rRNA   | 2.1913      | 0.0000      |
| TTTGGTGACTCTAGATAACCTCGGGCCGATCGCACGCCCC       | 40     | 18S-rRNA   | 2.0205      | 5.8429      |
| TTAGTTGGTGGAGCGAT                              | 17     | 18S-rRNA   | 2.3755      | 5.8429      |
| GGTTAATTCCGATAACGAACGAGACTCTGGCATGCTAACTAGT    | 43     | 18S-rRNA   | 2.5590      | 5.8429      |
| TTAGTTGGTGGAGCGATTTGTCTGGTTAATTCCGATAACGAACG   | 44     | 18S-rRNA   | 2.1973      | 7.7906      |
| GTCTGGTTAATTCCGATAACGAACGAGACTCTGGCATGCTAAC    | 43     | 18S-rRNA   | 2.1106      | 7.7906      |
| TGGTTAATTCCGATAACGAACGAGACTCTGGCATGCTAACTAG    | 43     | 18S-rRNA   | 2.5648      | 7.7906      |
| TCTTAGTTGGTGGAGCGATTTGTCTGGTTAATTCCGATAACGAA   | 44     | 18S-rRNA   | 2.7403      | 7.7906      |
| AGACGGACCAGAGCGAAAGCATTGCAAGAATGTTTCATTAAT     | 45     | 18S-rRNA   | 2.0833      | 8.1270      |
| TCTTAGTTGGTGGAGCGAT                            | 19     | 18S-rRNA   | 2.1012      | 8.1270      |
| TTAGTTGGTGGAGCGATTTGTCTGGTTAATTCCGATAACGAA     | 42     | 18S-rRNA   | 2.8972      | 8.1270      |
| CTTAGTTGGTGGAGCGAT                             | 18     | 18S-rRNA   | 2.3625      | 8.1270      |
| TGGTTAATTCCGATAACGAACGAGACTCTGGCATGCTAACTAGT   | 44     | 18S-rRNA   | 2.1005      | 8.1270      |
| GGGGCGGGGGGCCGGA                               | 17     | 28S-rRNA   | 11.1189     | 0.0000      |
| GTGTGGAACCTGGCGCTAAACCATTCTGTAGACGACCTGCTT     | 41     | 28S-rRNA   | 2.0208      | 0.0000      |
| ATTCAAACGAGAACTTTGAAGGCCGAAGTGGAGAAGGGTTCCA    | 43     | 28S-rRNA   | 2.3532      | 0.0000      |
| TGGCGACCCGCTGAA                                | 15     | 28S-rRNA   | 2.2478      | 5.8429      |
| TGGCGTGGAGCCGGGC                               | 16     | 28S-rRNA   | 9.6442      | 5.8429      |
| TCCTCCCACCCCTC                                 | 15     | 28S-rRNA   | 3.0462      | 7.7906      |
| GCAAATCGGTTCGTCGACCTGGGTATAGGGGCGAAAGAC        | 39     | 28S-rRNA   | 2.0118      | 7.7906      |
| CTCGCTGCGATCTATTGAAAGTCAGCCCTCGACACAAGGGT      | 41     | 28S-rRNA   | 2.0725      | 7.7906      |
| GATTTCTGCCAGTGCTCTGAATGTCAAAGTGAAGAAATCAAT     | 44     | 28S-rRNA   | 2.9102      | 7.7906      |
| AATTAGTGACGCGCATGAATGGATGAACGAGATTCCCAC        | 39     | 28S-rRNA   | 2.0365      | 7.7906      |
| ACGTTGAACGCACGTTTCGTGTGGAACCTGGCGCTAAACCATTCTG | 44     | 28S-rRNA   | 2.3707      | 7.7906      |
| AGACGACCTGCTTCTGGGTCGGGGTTTCGTACGTAGCAGAGCAG   | 44     | 28S-rRNA   | 2.3127      | 7.7906      |
| GTGTGGAACCTGGCGCTAGACCAT                       | 24     | 28S-rRNA   | 3.4860      | 7.7906      |
| GTGTGGAACCTGGCGCTAAACCAT                       | 24     | 28S-rRNA   | 2.4817      | 7.7906      |
| GAGCCAATGGGGCGAAGCTACCATCTGTGGATTATGACTGAA     | 43     | 28S-rRNA   | 2.3690      | 7.7906      |
| TGAAACACGGACCAAGGAGTCTAACGCGTGC GCGAGTCAGGGGCT | 45     | 28S-rRNA   | 2.8513      | 7.7906      |
| ATTCAAACGAGAACTTG                              | 18     | 28S-rRNA   | 2.5514      | 7.7906      |

|                                                |    |                        |        |        |
|------------------------------------------------|----|------------------------|--------|--------|
| GTTGAACGCACGTTTCGTGTGGAACCTGGCGCTAAACCATTTCG   | 42 | 28S-rRNA               | 2.2064 | 7.7906 |
| GTGTGGAACCTGGCGCTAAACCATTTCGTAGACGACCTGCT      | 40 | 28S-rRNA               | 2.0488 | 7.7906 |
| GGGGGACCGTCGGT                                 | 15 | 28S-rRNA               | 4.0398 | 7.7906 |
| ACGTTTCGTGTGGAAC                               | 15 | 28S-rRNA               | 2.6031 | 8.1270 |
| GAAACACGGACCAAGGAGTCTAACGCGTGCGGAGTCAGGGGCT    | 44 | 28S-rRNA               | 2.7348 | 8.1270 |
| TTGACTCTAGTCTGGCACGGTGAAGAGACATGAGAGGTGTAGAA   | 44 | 28S-rRNA               | 3.0585 | 8.1270 |
| CGCGACCTCAGATCAGA                              | 17 | 28S-rRNA               | 2.2721 | 8.1270 |
| TGGAGCACGAGCGTACGCGTTAGGACCCGAAAGATGGTGAA      | 41 | 28S-rRNA               | 2.6925 | 8.1270 |
| TAGACGACCTGCTTCTGGGTCGGGGTTTCGTACGTAGCAGAGCAG  | 45 | 28S-rRNA               | 2.0220 | 8.1270 |
| AGGACGGTGGCCATGGAAGTCGGAATCCGCTAAGGAGTGTGTAA   | 44 | 28S-rRNA               | 2.6189 | 8.1270 |
| ACGTTTCGTGTGGAACCTGGCGCTAAACCAT                | 30 | 28S-rRNA               | 2.1311 | 8.1270 |
| CGCGACCTCAGATCAGACGTGGCGACCCGCTGAATTTAAGCATA   | 44 | 28S-rRNA               | 2.1629 | 8.1270 |
| GGAGCACGAGCGTACGCGTTAGGACCCGAAAGATGGTGAA       | 40 | 28S-rRNA               | 2.2785 | 8.1270 |
| GAGCCAATGGGGCGAAGCTACCATCTGTGGGATTATGACTGAACG  | 45 | 28S-rRNA               | 2.4328 | 8.1270 |
| ATCCTTCGATGTGGCTCTTCCTATCATTGTGAAGCAGAATTCAC   | 45 | 28S-rRNA               | 2.7807 | 8.1270 |
| AGCCGACTTAGAACTGGTGCGGACCAGGGGAATCCGACTGTC     | 42 | 28S-rRNA               | 2.0335 | 8.1270 |
| AACCGACTTAGAACTGGTGCGGACCAGGGGAATCCGACTGTT     | 42 | 28S-rRNA               | 2.2615 | 8.1270 |
| CGCGACCTCAGATCAG                               | 16 | 28S-rRNA               | 2.2767 | 8.1270 |
| AAACGAGAACTTTGAA                               | 16 | 28S-rRNA               | 3.5657 | 8.1270 |
| ATTAGTGACGCGCATGAATGGATGAACGAGATTCCCAC         | 38 | 28S-rRNA               | 2.2235 | 8.1270 |
| AGCCGACTCAGAACTGGTGCGGACCAGGGGAATCCGACTGTT     | 42 | 28S-rRNA               | 2.1549 | 8.1270 |
| TGGGCCACTTTTGGTAAGCAGAACTGGCGCTGCGGGATGAA      | 41 | 28S-rRNA               | 2.6329 | 8.1270 |
| AGGACACATTGATCATCGACACTTCGAACGCACTTGCGGCCCG    | 44 | 5.8S-rRNA              | 2.0234 | 8.1270 |
| AAAAACATTAGACTGTGAATCTGACAACAGGAAATAAACCTCCTT  | 45 | mature-mt_tRNA-His-GTG | 4.6325 | 0.0000 |
| AAAAACATTAGACTGTGAATCTGACAACAGGAAATAAACCTCCTT  | 44 | mature-mt_tRNA-His-GTG | 4.9751 | 0.0000 |
| AAAAACATTAGACTGTGAATCTGACAACAGGAAATAAACCTCCT   | 43 | mature-mt_tRNA-His-GTG | 4.8024 | 5.8429 |
| AAAAACATTAGACTGTGAATCTGACAACAGGAAATAAACCTCCTTA | 45 | mature-mt_tRNA-His-GTG | 4.1089 | 5.8429 |
| AAACATTAGACTGTGAATCTGACAACAGGAAATAAACCTCCTTA   | 44 | mature-mt_tRNA-His-GTG | 5.1753 | 5.8429 |
| AAAAACATTAGACTGTGAATCTGACAACAGGAAATAAACCTCCT   | 44 | mature-mt_tRNA-His-GTG | 5.2256 | 7.7906 |
| AAACATTAGACTGTGAATCTGACAACAGGAAATAAACCTCCT     | 42 | mature-mt_tRNA-His-GTG | 4.7049 | 7.7906 |
| AAACATTAGACTGTGAATCTGACAACAGGAAATAAACCTCCTT    | 43 | mature-mt_tRNA-His-GTG | 5.3681 | 7.7906 |
| TAGACTGTGAATCTGACAACAGGAAATAAACCTCCTTATTCACCC  | 45 | mature-mt_tRNA-His-GTG | 4.1905 | 7.7906 |
| CAAAAAACATTAGACTGTGAATCTGACAACAGGAAATAAACCTCC  | 45 | mature-mt_tRNA-His-GTG | 5.0375 | 8.1270 |
| AGTTTACAAAAACATTAGACTGTGAATCTGACAACAGG         | 39 | mature-mt_tRNA-His-GTG | 4.9983 | 8.1270 |
| AAGGCATTGGCCTCCTAAGCCAGGGATTGTGGGTT            | 35 | mature-tRNA-Arg-CCT    | 2.3384 | 7.7906 |



|                                     |    |                                                     |        |        |
|-------------------------------------|----|-----------------------------------------------------|--------|--------|
| AAGGCACTGGCCTCCTAAGCCAGGGATTGTGGGTT | 35 | mature-tRNA-Arg-CCT                                 | 2.2728 | 7.7906 |
| ATTGGCCTCCTAAGCCAGGGATTGTGGGTT      | 30 | mature-tRNA-Arg-CCT                                 | 3.3051 | 8.1270 |
| GCATTGGTGGTTCAGTGGTAGAAT            | 24 | mature-tRNA-Gly-GCC_5_end;mature-tRNA-Gly-CCC_5_end | 2.8288 | 8.1270 |
| GGTAGCGTGGCCGAG                     | 15 | mature-tRNA-Leu-AAG_5_end;mature-tRNA-Leu-TAG_5_end | 5.5337 | 0.0000 |
| GGTAGCGTGGCTGAG                     | 15 | mature-tRNA-Leu-AAG_5_end;mature-tRNA-Leu-TAG_5_end | 3.0582 | 8.1270 |

Supplemental Figure 1. Uncropped Western blot images

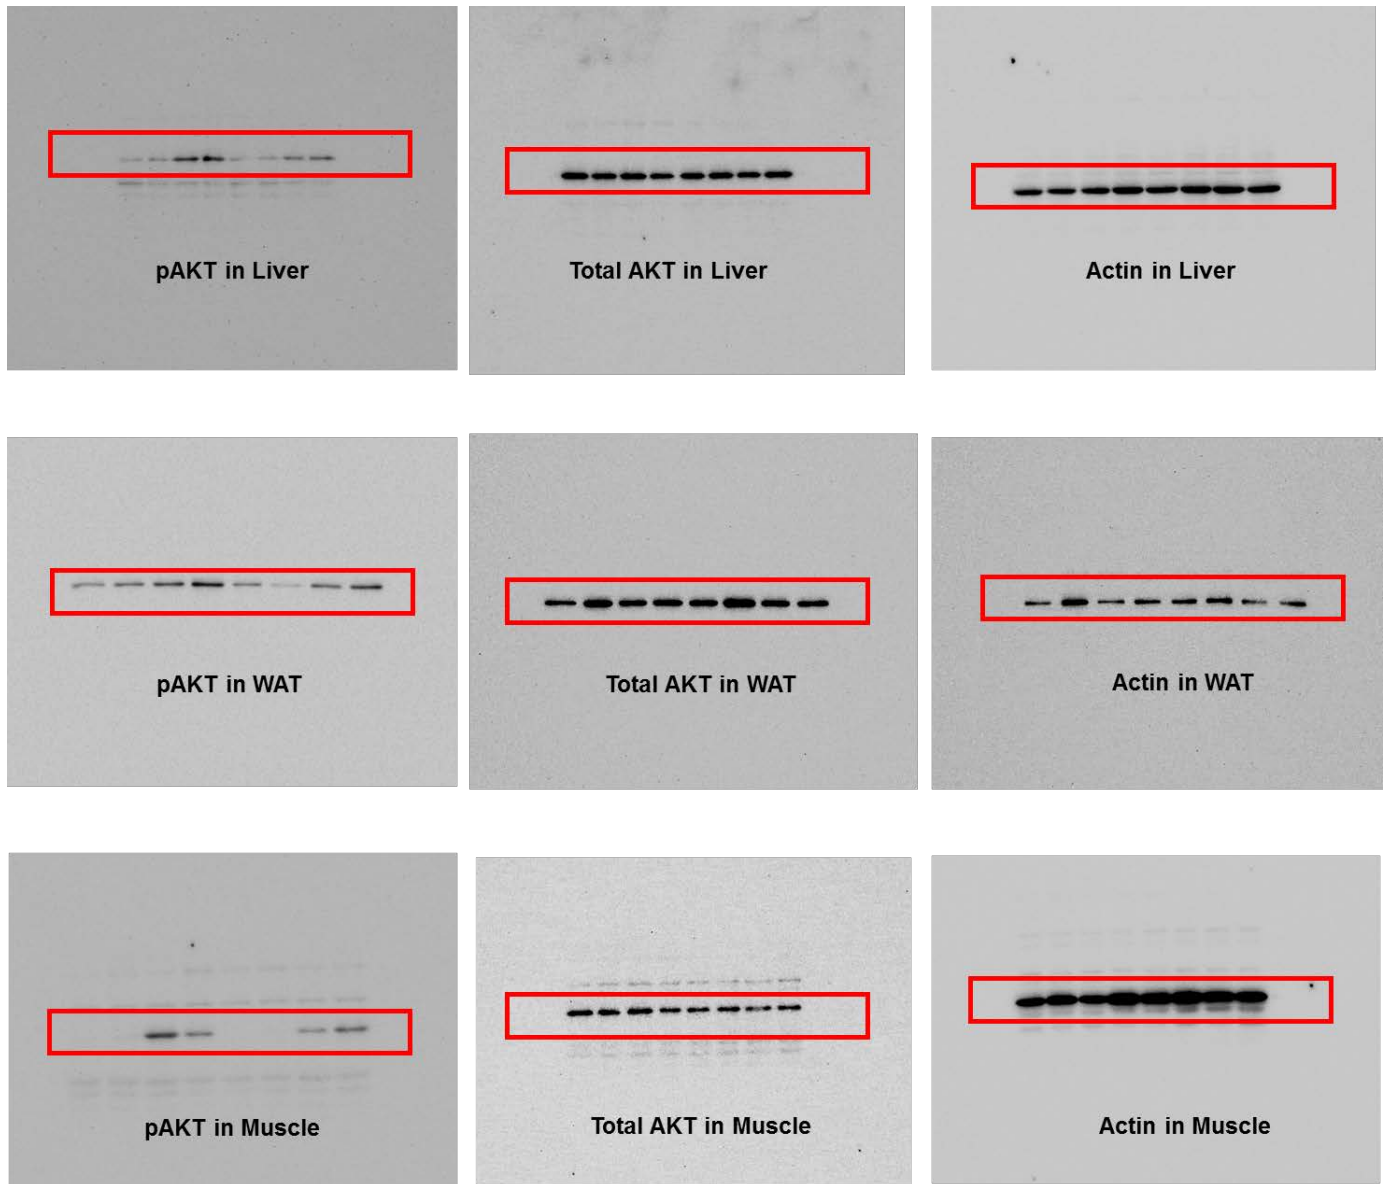

Supplement: NIHMS1890150-supplement-Supplementary_Material.pdf [file NIHMS1890150-supplement-Supplementary_Material.pdf]
